# Supplementary material for: Experimental assessment of lanthanide ion donor preference: spectroscopic and theoretical dissection of static charge and dynamic polarisation contributions to axial ligation in a C4-symmetric chiral europium complex.
Source: Royal Society of Chemistry journal article supplement (doi:10.1039/b105006k), 2001-10-17
Supplement: b105006k(1).doc [file b105006k%281%29.doc]

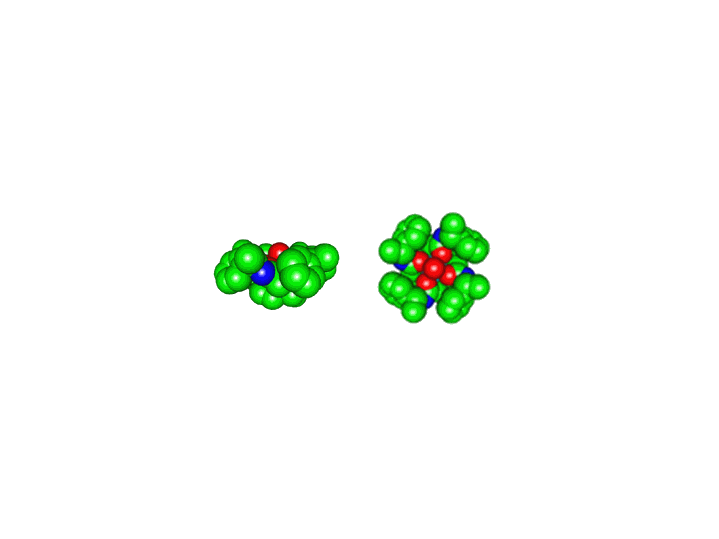
**Figure S1**: Side and end space-filling views of [Eu**1**(H2O)]3+; from the crystal structure, showing the absence of steric congestion for an axial donor.
