# Supplementary material for: Experimental assessment of lanthanide ion donor preference: spectroscopic and theoretical dissection of static charge and dynamic polarisation contributions to axial ligation in a C4-symmetric chiral europium complex.
Source: Royal Society of Chemistry journal article supplement (doi:10.1039/b105006k), 2001-10-17
Supplement: b105006k(2).doc [file b105006k%282%29.doc]

**Figure S2**: 1H NMR shifts of selected ligand resonances as a function of axial donor (rel. tBuOH, 295 K, 300 MHz).

**CH3CN**

**Pyridine**

**MeNO2**

**MeOH**

**H2O**

**DMF**

**DMSO**

**HMPA**

****

**DMAP**

**octylamine**

**Proton NMR shift correlation Is consistent with retention of common geometry**

**-30**

**-20**

**-10**

**0**

**10**

**20**

**30**

**40**

**50**

Hax

Heq

CH2
