# Supplementary material for: Experimental assessment of lanthanide ion donor preference: spectroscopic and theoretical dissection of static charge and dynamic polarisation contributions to axial ligation in a C4-symmetric chiral europium complex.
Source: Royal Society of Chemistry journal article supplement (doi:10.1039/b105006k), 2001-10-17
Supplement: b105006k(4).doc [file b105006k%284%29.doc]

**Figure S****4**: Correlation of free energy of axial exchange (295 K, MeCN) with the integrated *J* = 2/*J* = 1 intensity ratio for oxygen donors.
