# Supplementary material for: Experimental assessment of lanthanide ion donor preference: spectroscopic and theoretical dissection of static charge and dynamic polarisation contributions to axial ligation in a C4-symmetric chiral europium complex.
Source: Royal Society of Chemistry journal article supplement (doi:10.1039/b105006k), 2001-10-17
Supplement: b105006k(6).doc [file b105006k%286%29.doc]

**Figure S6**: Representative limiting Eu emission spectra (**exc 397 nm) for differing axial donors.

a) water, DMAP, HMPA and pyridine.

b) DMSO and DMF.

c) pyridine, methanol and nitromethane.
